# Supplementary material for: Protein A-mesoporous silica composites for chromatographic purification of immunoglobulin G
Source: Royal Society of Chemistry journal article supplement (doi:10.1039/d0nj00337a), 2020-01-01
Supplement: d0nj00337a1.pdf [file d0nj00337a1.pdf]

## Supporting information

### Protein A-Mesoporous Silica Composites for Chromatographic Purification of Immunoglobulin G

Si Huang,<sup>a,c,d</sup> Si-Yuan Chen,<sup>a</sup> Shu-Yuan Zhang,<sup>a</sup> Yi-Lun Yan,<sup>a</sup> Song-Liang Cai,<sup>\*a</sup> Xin-Le Li,<sup>\*b</sup> Sheng-Run Zheng,<sup>a</sup> Jun Fan<sup>a</sup> and Wei-Guang Zhang<sup>\*a</sup>

<sup>a</sup>School of Chemistry, South China Normal University, Guangzhou 510006, China

<sup>b</sup>The Molecular Foundry, Lawrence Berkeley National Laboratory, Berkeley, California 94720, USA

<sup>c</sup>Key Laboratory of Phytochemical R&D of Hunan Province, Hunan Normal University, Changsha 410081, China

<sup>d</sup>Laboratory of Organic Chemistry, Wageningen University, Stippeneng 4, 6703 WE Wageningen, the Netherlands

E-mail: songliangcai@m.scnu.edu.cn; xinlel@lbl.gov; wgzhang@scnu.edu.cn

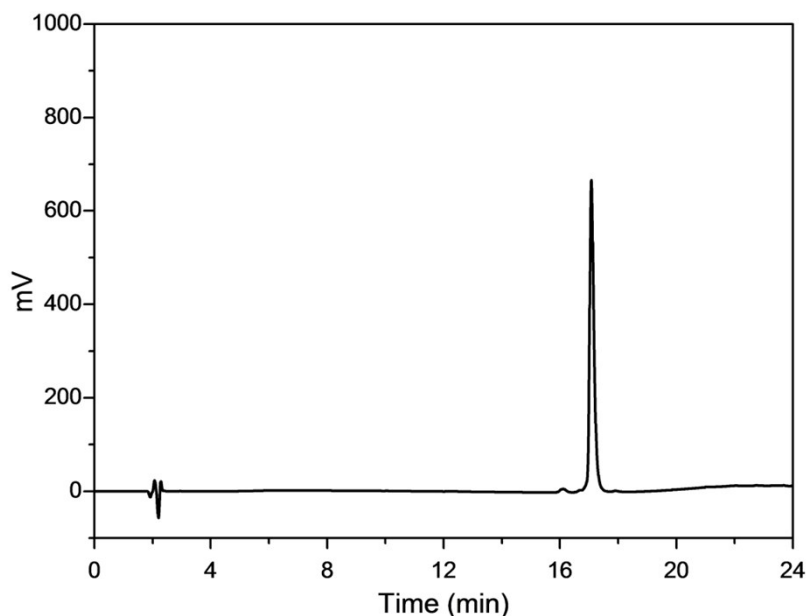

**Fig. S1** HPLC chromatogram of standard protein A (1.5 mg/mL) on a Waters Xbride BEH C4 column (4.6 × 250 mm, 3.5 μm pore size). Chromatographic conditions: UV detector at 220 nm; mobile phase A is water containing 0.1% trifluoroacetate; mobile phase B is acetonitrile containing 0.1% trifluoroacetate; the percentage of mobile phase A increases from 1% to 90% within 40 min at a flow rate of 1 mL/min.

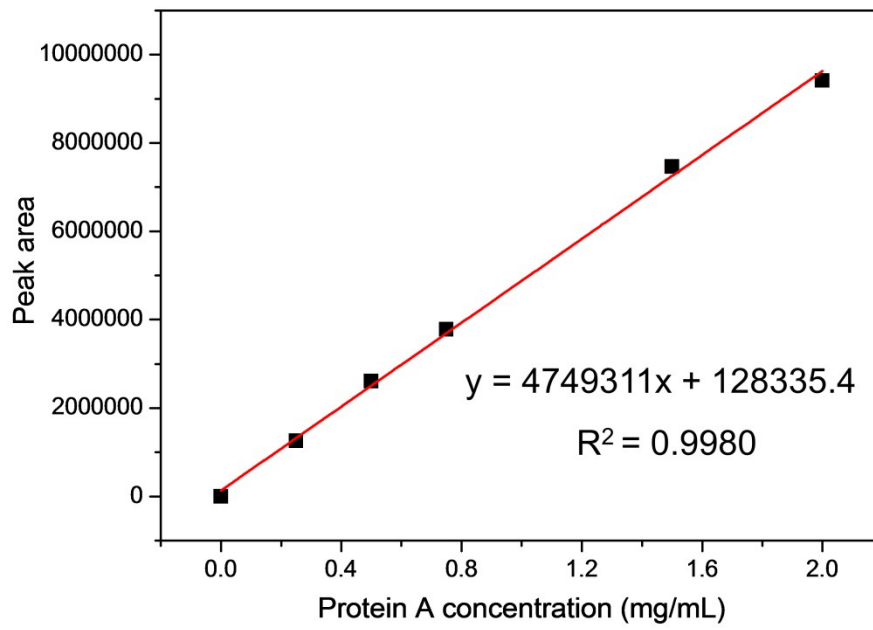

**Fig. S2** The calibration curve of protein A.

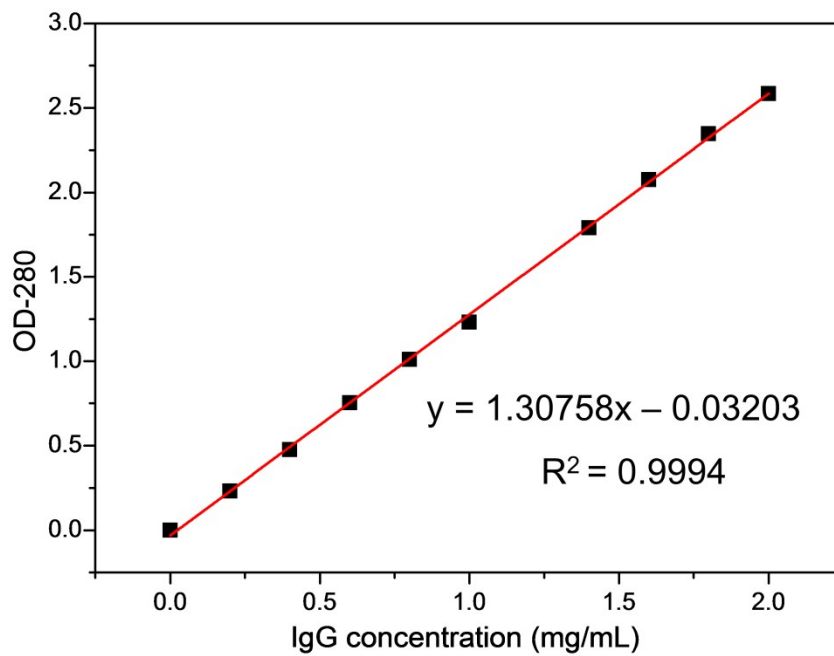

**Fig. S3** The calibration curve of IgG.
